# Supplementary material for: Embroidered electrochemical sensors for biomolecular detection
Source: Royal Society of Chemistry journal article supplement (doi:10.1039/c6lc00307a), 2016-01-01
Supplement: c6lc00307a1.pdf [file c6lc00307a1.pdf]

## Supplementary Information

### Embroidered electrochemical sensors for biomolecular detection

Xiyuan Liu and Peter B. Lillehoj\*

Department of Mechanical Engineering, Michigan State University, East Lansing, MI USA

\*lillehoj@egr.msu.edu, Tel: +1-517-432-2976

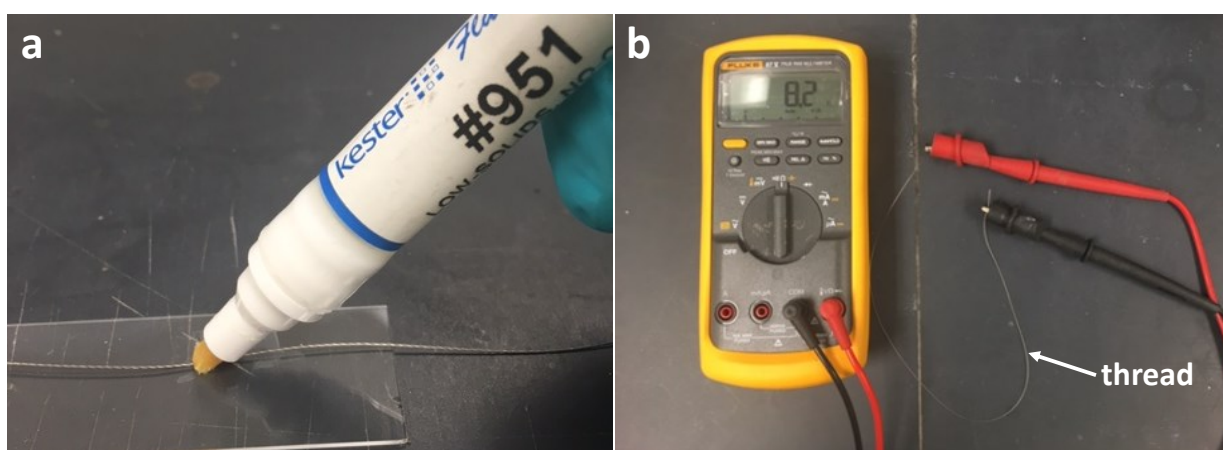

Figure S1. Photographs showing the flux application process (a) and thread resistance measurements (b).

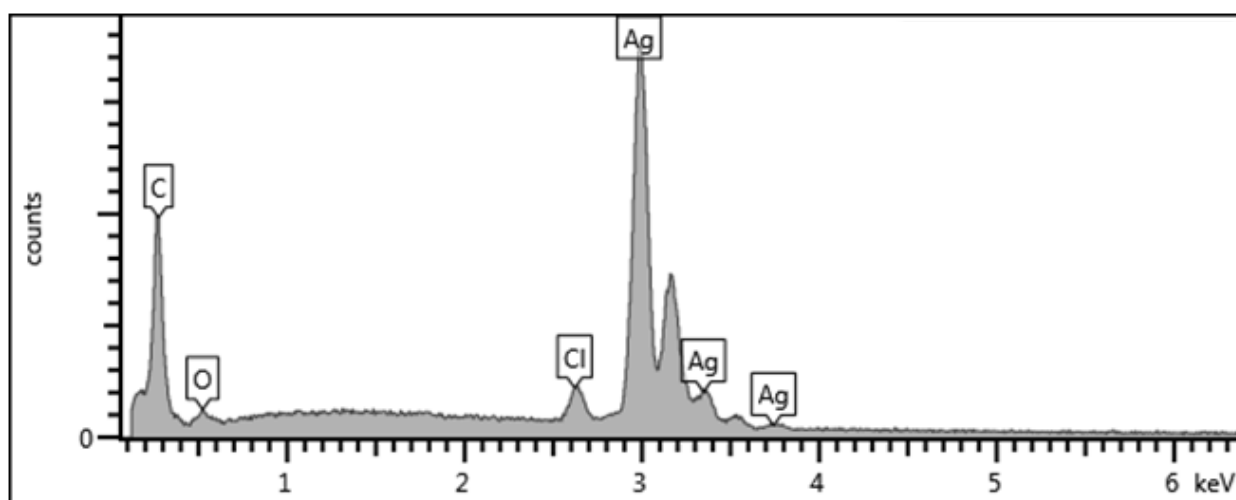

Figure S2. EDS spectrum of Ag/AgCl-coated thread containing Ag, C, Cl and O.
